# Supplementary material
Source: PubMed Central journal article supplement (PMC8434897)
Supplement: NIHMS1064230-supplement-Supp_table_1.pdf [file NIHMS1064230-supplement-Supp_table_1.pdf]

**Supplemental Table 1:**

Strains of the HMDP that were utilized in this study

| <b>Strains of the HMDP that were utilized in this study</b> |              |             |            |
|-------------------------------------------------------------|--------------|-------------|------------|
| BXD24b/TyJ                                                  | BXA8/PgnJ    | BXA14/PgnJ  | KK/HIJ     |
| BXH8/TyJ                                                    | CXB1/ByJ     | BXD31/TyJ   | BXH22/KccJ |
| BXD34/TyJ                                                   | CXB7/ByJ     | 129X1 / SvJ | AXB8/PgnJ  |
| AXB13/PgnJ                                                  | C3H/HeJ      | CXB11/HiAJ  | BXH10/TyJ  |
| BXD69/RwwJ                                                  | BXD44/RwwJ   | BXH20/KccJ  | FVB/NJ     |
| AXB4/PgnJ                                                   | BTBRT<+>tf/J | BXD48A/RwwJ | AXB2/PgnJ  |
| BXD28/TyJ                                                   | I/LnJ        | BXD29/TyJ   | MA/MyJ     |
| BXH7/TyJ                                                    | BXD12/TyJ    | BXD5/TyJ    | C58 /J     |
| BXH19/TyJ                                                   | NZW/LacJ     | BXA16/PgnJ  | BXD2/TyJ   |
| CXB12/HiAJ                                                  | AXB23/PgnJ   | NZB/BINJ    | BXD61/RwwJ |
| BXD45/RwwJ                                                  | AXB15/PgnJ   | BXD100/RwwJ | BXD75/RwwJ |
| AXB19a/PgnJ                                                 | BXA25/PgnJ   | CE/J        | BXA4/PgnJ  |
| BXH9/TyJ                                                    | CXB9/HiAJ    | SM/J        | BXA13/PgnJ |
| AXB10/PgnJ                                                  | BXA7/PgnJ    | BXD55/RwwJ  | NOD/ShiLtJ |
| BXD63/RwwJ                                                  | CXB2/ByJ     | BXD71/RwwJ  | CBA/J      |
| NOR/LtJ                                                     | BXD48/RwwJ   | SWR/J       | BXD39/TyJ  |
| AXB19b/PgnJ                                                 | AXB5/PgnJ    | BXA2/PgnJ   | BXH2/TyJ   |
| SEA/GnJ                                                     | BXH14/TyJ    | C57L /J     | BALB/cByJ  |
| AXB1/PgnJ                                                   | NON/LtJ      | RIIIS/J     | BXD38/TyJ  |
| BXH6/TyJ                                                    | LG/J         | BXD11/TyJ   | BXD1/TyJ   |
| A /J                                                        | BXD40/TyJ    | C57BL / 6J  | C57BLKS/J  |
| AXB24/PgnJ                                                  | BALB/cJ      | BXD56/RwwJ  | SJL/J      |
| BXA12/PgnJ                                                  | BXD65/RwwJ   | AKR/J       | MRL/MpJ    |
| AXB19/PgnJ                                                  | DBA/2J       | BXD62/RwwJ  | BUB/BnJ    |
| BXA1/PgnJ                                                   | BXD67/RwwJ   | AXB6/PgnJ   | BXD60/RwwJ |
| BXD32/TyJ                                                   | PL/J         | BXD49/RwwJ  | BXD84/RwwJ |
