# Supplementary material
Source: PubMed Central journal article supplement (PMC8434897)

# Supplemental Figure 1:

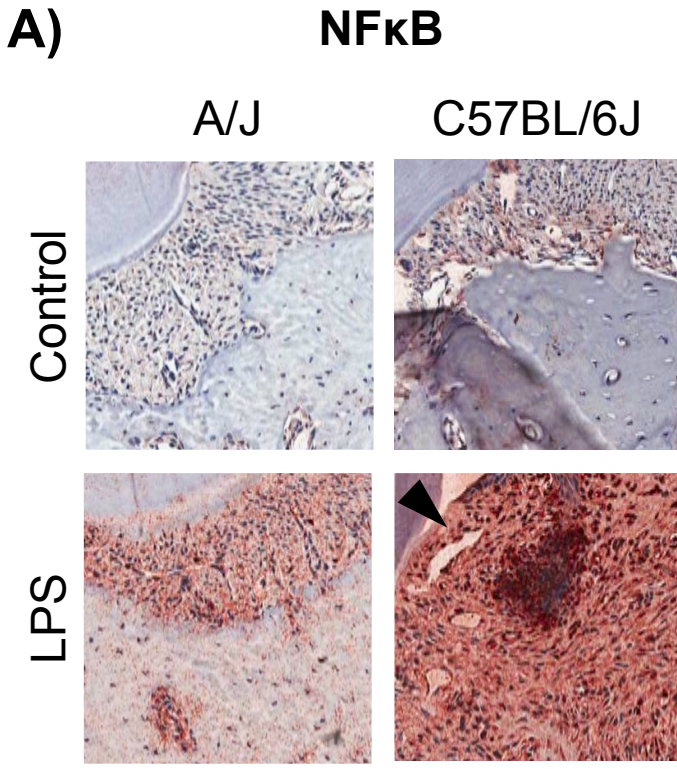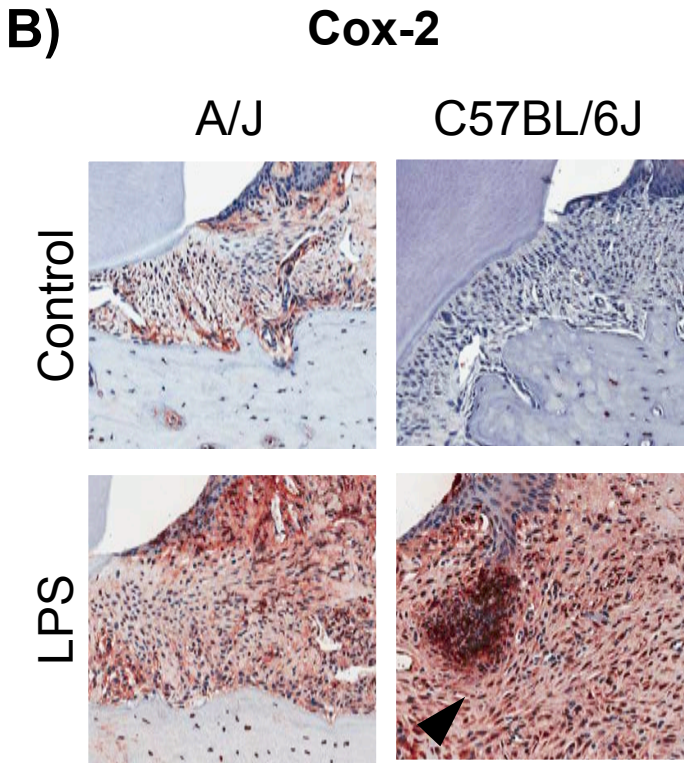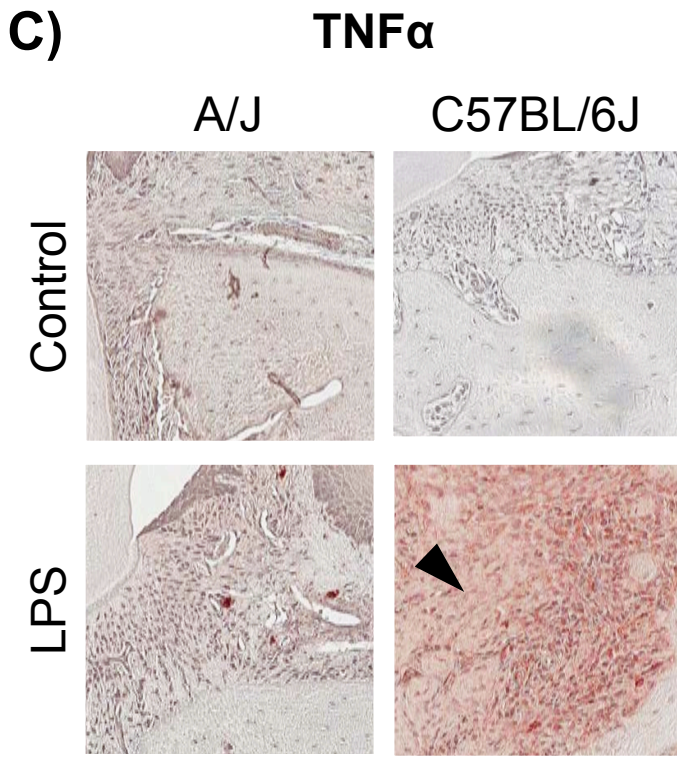

# Supplemental Figure 2:

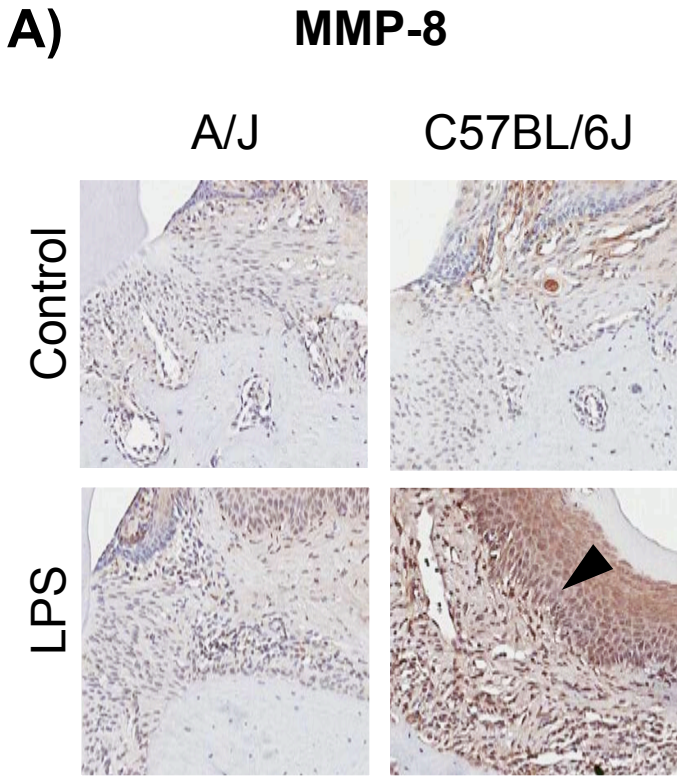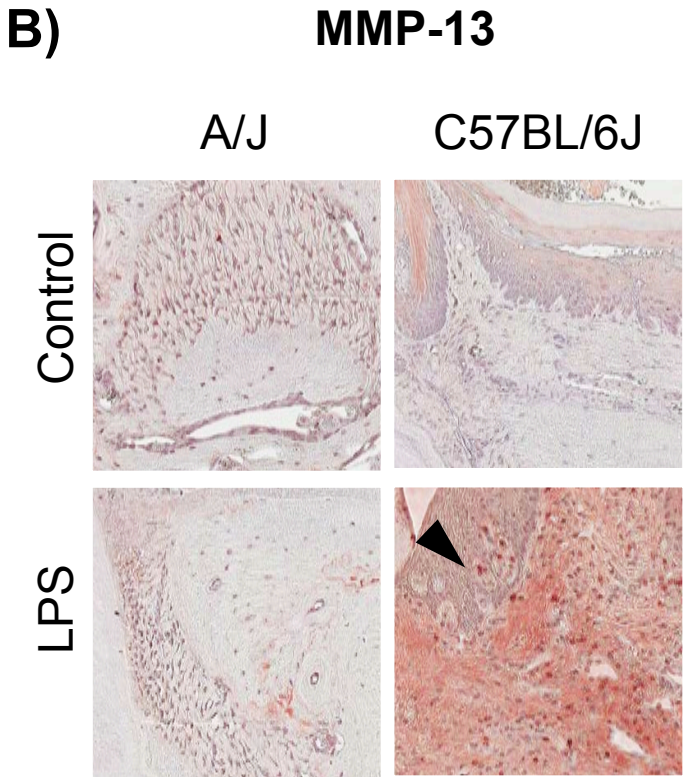

# Supplemental Figure 3:

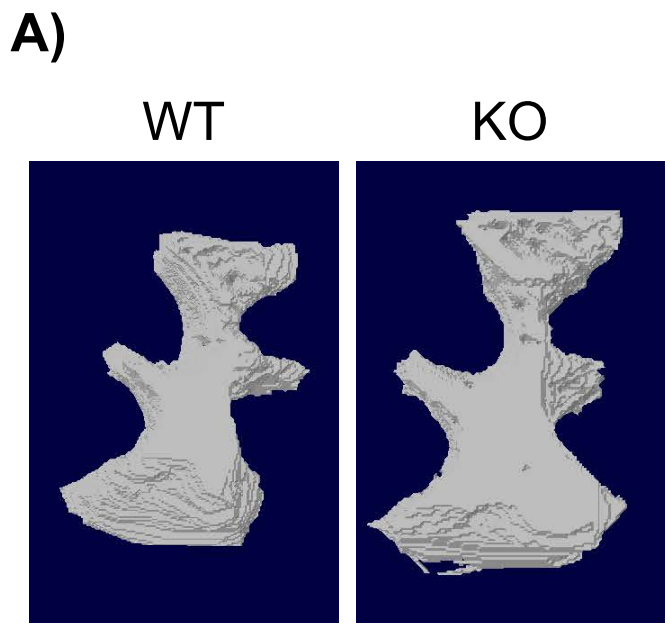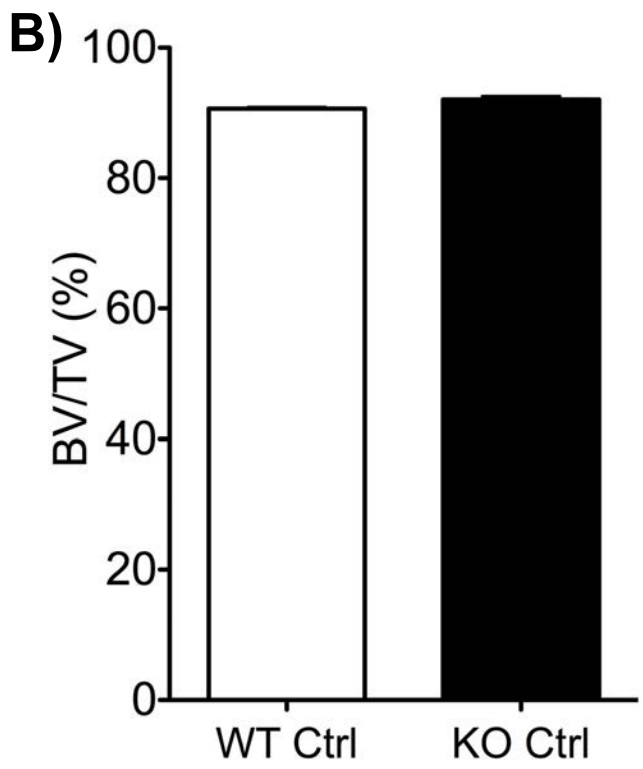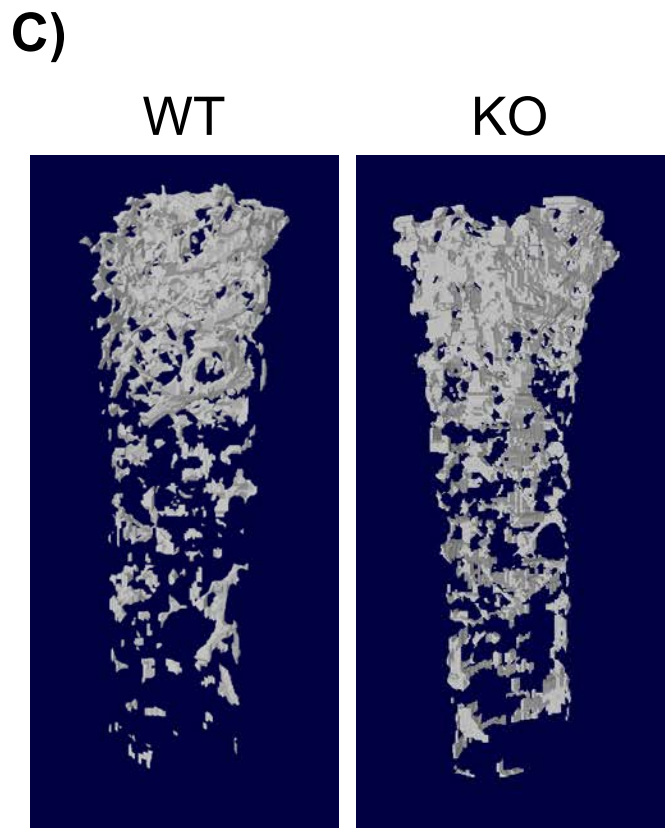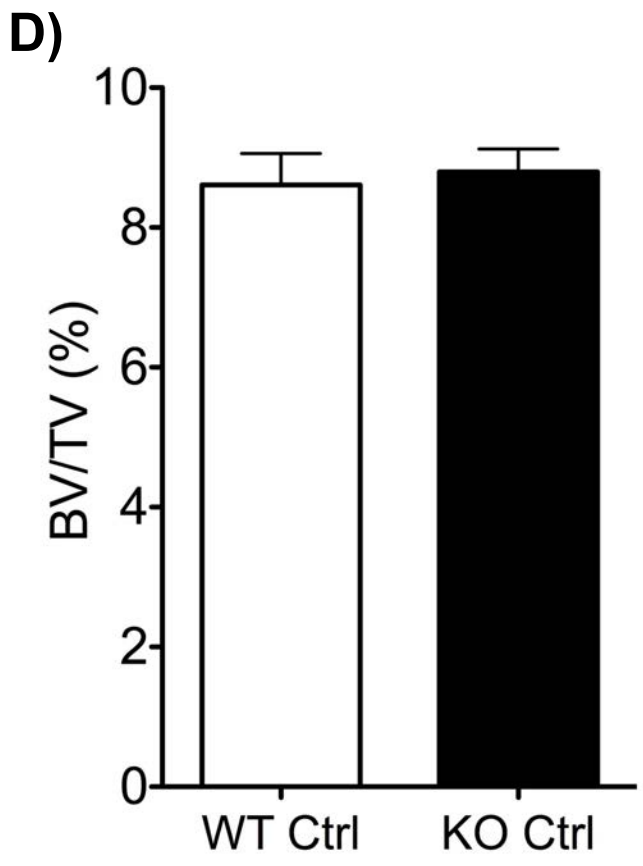

Supplement: NIHMS1064230-supplement-supplemental_images.pdf [file NIHMS1064230-supplement-supplemental_images.pdf]
